# Supplementary material
Source: PubMed Central journal article supplement (PMC4074640)
Supplement: peds.2012-2443_peds.2012-2443SupplementaryData.pdf [file peds.2012-2443_peds.2012-2443SupplementaryData.pdf]

## Supplemental Information

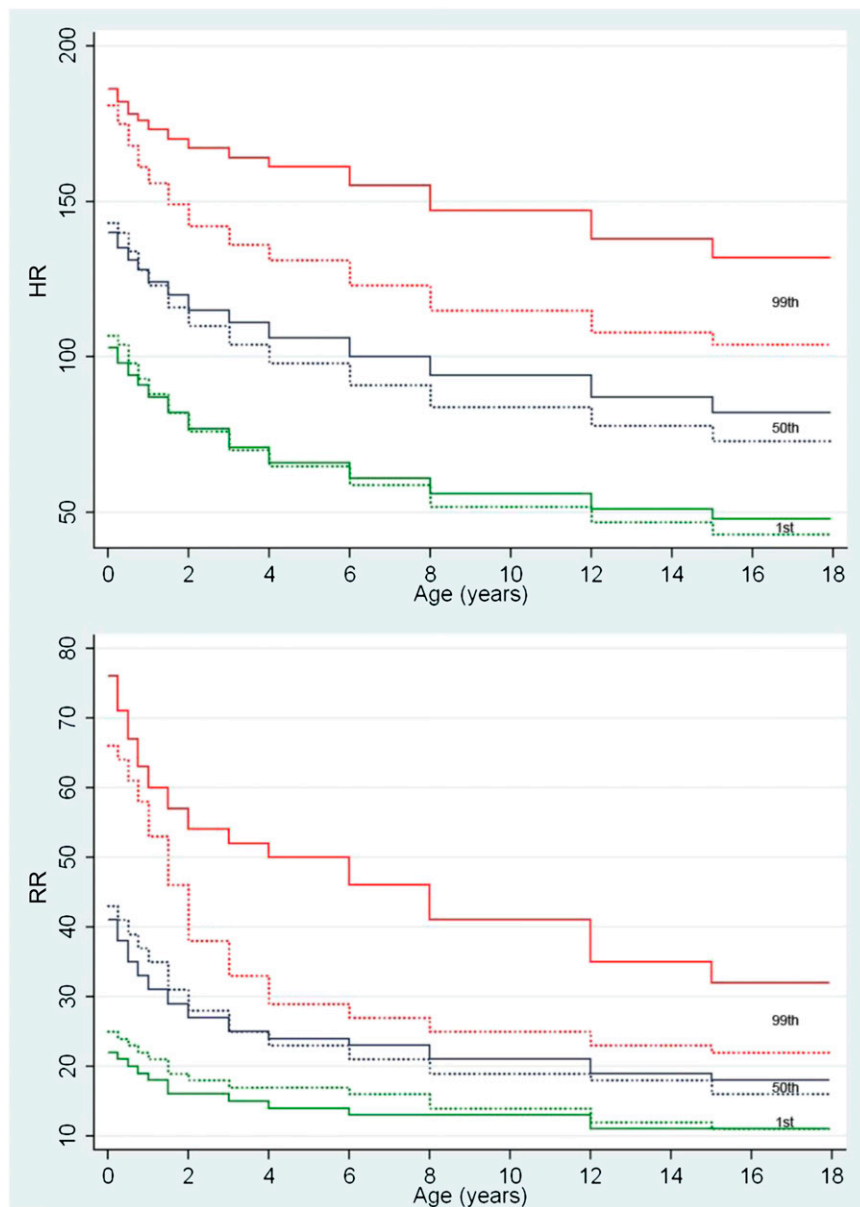

### SUPPLEMENTAL FIGURE 1

Comparison of suggested first, 50th, and 99th percentile cut points from this study (solid lines) with a recent meta-analysis<sup>22</sup> of data from primarily well children in nonhospital settings (dotted lines).
